# Supplementary material
Source: PubMed Central journal article supplement (PMC7906287)
Supplement: NIHMS1667021-supplement-scls-2020-0146-Figure_S1-S22.pdf [file NIHMS1667021-supplement-scls-2020-0146-Figure_S1-S22.pdf]

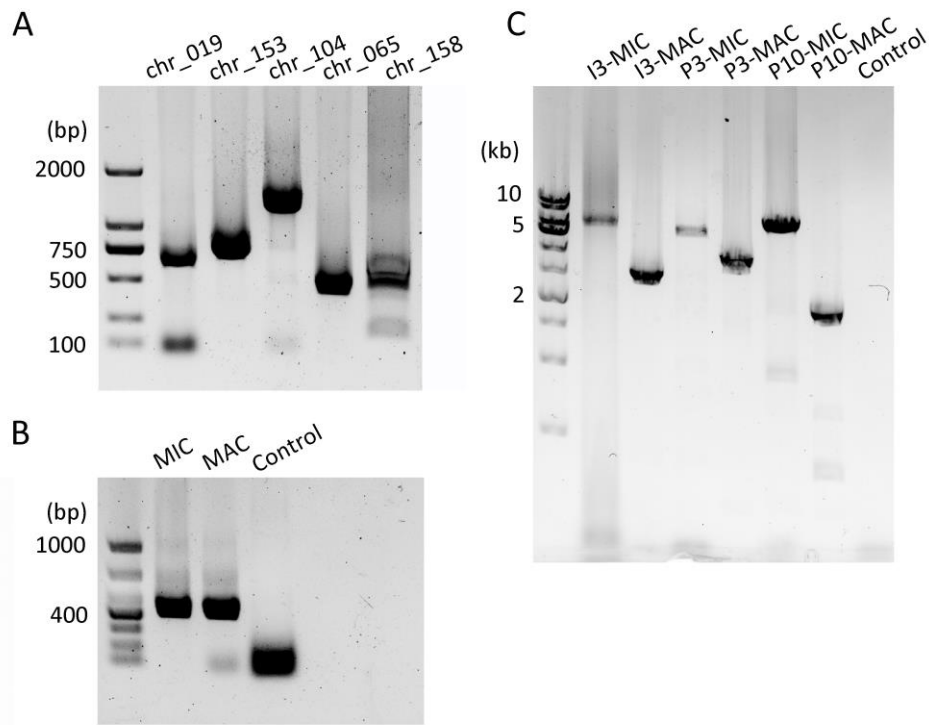

Figure S1. Gel electrophoresis results in this study.

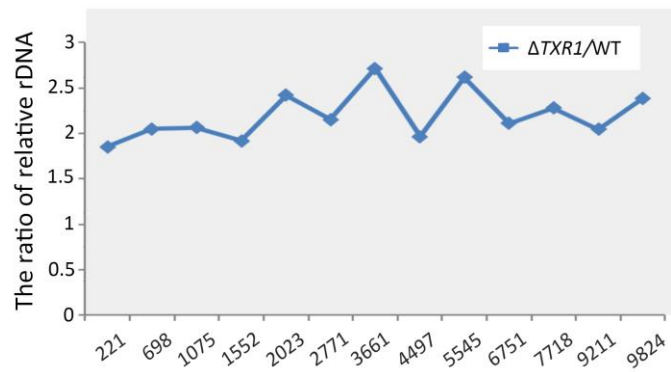

Figure S2. qPCR analysis confirmed that the copy number of the rDNA minichromosome increases in replication-deficient  $\Delta TXR1$  cells. The x-axis represents the midpoint of the amplified sequences. The y-axis represents the ratio of relative quantity of  $\Delta TXR1$  over the WT (normalized by *JMJI*).
