# Supplementary material
Source: PubMed Central journal article supplement (PMC7906287)
Supplement: NIHMS1667021-supplement-scls-2020-0146-Table_S1.pdf [file NIHMS1667021-supplement-scls-2020-0146-Table_S1.pdf]

**Table S1. Primers used in this study.** Red: for IES test; yellow: for amplify the unknown sequences from the contigs' end to the telomeres; green: for scrambling detection; blue: for Q-PCR confirmation of rDNA copy number.

| Primer name    | sequence (5'-3')             | Note                        |
|----------------|------------------------------|-----------------------------|
| IES05521_f230  | CACTCCTAAAAATAGAGCTAGGG      |                             |
| IES05521_r649  | CTGATTCAATAAATTGTCAG         |                             |
| tolemere       | CAACCCCAACCCCAACC            |                             |
| chr_158_f1057  | GTGGGCAAATTATGAAAAGGC        |                             |
| chr_104_r535   | GGAATCTCTAAGGTAACAATACTG     |                             |
| chr_065_r453   | CCGTATTATATGGTTATATGGCCGAATG |                             |
| chr_153_r666   | GTGATCCGAAGCCATTCATAAAGCCAC  |                             |
| chr_019_r588   | GATTTTCTCAAGCATTTTTCAATGG    |                             |
| JH659681_f163  | CTATTCATATCTATCATCAGCG       | P3                          |
| JH659681_r6029 | GACTTTTGC GTTTTACCATCAACAAC  | P3                          |
| JH659668_f404  | CAAATGGATGGTTCAGGATTTTGG     | P10                         |
| JH659668_r6277 | CATAACTAGCCTAATACACCTCTTC    | P10                         |
| JH659689_f355  | GATTTAACTCAGTGCGTTGGTC       | I3                          |
| JH659689_r6238 | GCCCTTCAGAAAATTTGCATATCCC    | I3                          |
| chr_105_f507   | GAGGAAAAGTGAGGTCTGGCGATC     | I3                          |
| chr_105_r3488  | GATGAGGGATTGCGACTTGCTAGC     | I3                          |
| chr_064_r4315  | GTAATAGACTTAGCACAGTTGTTTG    | P3                          |
| chr_064_f766   | CAATGAACTCATCCTAGATTAG       | P3                          |
| chr_101_f558   | GAGGAAGTGAGATAAGCATTGATGG    | P10                         |
| chr_101_r2548  | GCTAAATTTCCCCCTAAGTCTTTTAG   | P10                         |
| chr_134_f50    | CAGTATTTATTTTCTCATCAAAGATC   | Typical region in Figure 3B |
| chr_134_r432   | GGAAAAGTGAGGTCTGGGGCAAC      | Typical region in Figure 3B |
| JH660039_f404  | CCTATACCTTTTCGATCCTAATCCC    | Typical region in Figure 3B |
| JH660039_r1270 | CATATTCAAAATTGCACTTG         | Typical region in Figure 3B |
| JH660039_f597  | GCCCAGTTCCTTTTGGTCTCAC       | Typical region in Figure 3B |
| JH660039_r1584 | CTTTCAATGTGTTTTTCCC          | Typical region in Figure 3B |
| JH659799_f297  | GATGGAGATGGTGGTGGTAGTGG      | Typical region in Figure 3B |
| JH659799_r1088 | CTAAAATGTCAATTACGTGC         | Typical region in Figure 3B |
| rDNA_f133      | TATATTCTGCTAATTTCACTGGTG     |                             |
| rDNA_r308      | CTCATTTTTTAGAACCTATTTTGCTTG  |                             |
| rDNA_f564      | GTAAAATAGTTTTAGGAATATGAG     |                             |
| rDNA_r831      | CTAAGTCTTTTTTCAACTCTC        |                             |
| rDNA_f996      | CATAAAACAATTTTAACAGCATGCG    |                             |
| rDNA_r1154     | CTAGATAAACTTTTTCTTTAAGTTCTC  |                             |
| rDNA_f1492     | GACTCGCTTAATATTTCGCGG        |                             |
| rDNA_r1611     | CTCATTTTTAAGCGAGTCTGCTTC     |                             |
| rDNA_f1956     | TTGGGCAACCAAGGATAACG         |                             |
| rDNA_r2090     | CCATTTGCTCTAATACGAGCC        |                             |
| rDNA_f2663     | GATTACATGGATAACCGAGCTAATTG   |                             |
| rDNA_r2879     | GTGACTGCCATGGTAGTCCAATAC     |                             |
| rDNA_f3505     | AGACGATCAGATACCGTCGTAGTC     |                             |
| rDNA_r3817     | AACCAGACAAATCACTCCACCAAC     |                             |
| rDNA_f4425     | TTTCAACGGTGGATATCTAGGTTT     |                             |
| rDNA_r4569     | CCACACTGAAACAAACATGAAGG      |                             |

|            |                             |  |
|------------|-----------------------------|--|
| rDNA_f5416 | GAAACACGGACCAAGGAGTCTATC    |  |
| rDNA_r5674 | ACTCAAATTTGACGAACGATTTGC    |  |
| rDNA_f6641 | CCTCTGGTCCATAGAACAATGTAG    |  |
| rDNA_r6865 | TTTGTCCGCTTCAGTTCTGAGTTG    |  |
| rDNA_f7632 | CGATCCTGTAAAACCACTACCCAC    |  |
| rDNA_r7810 | CACTTAGGACGCCTGCGTTATGG     |  |
| rDNA_f9073 | GTGACTAAAGCAGTCCCAGAGCC     |  |
| rDNA_r9366 | CAATATAGGTCTTTGACGGCTGGAG   |  |
| rDNA_f9739 | GCGTGTA AAAATGCGCTAAACTACGC |  |
| rDNA_r9909 | ATCTCATAAATTATAGAGATCAACC   |  |
